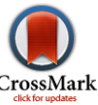

## Correction

# Correction: Nano-Scale Morphology of Melanosomes Revealed by Small-Angle X-Ray Scattering

**The PLOS ONE Staff**

In the Methods section, there is an error in the second equation under the sub-heading “Small angle X-ray scattering at ambient temperatures.” Please view the complete, correct equation here:

$$q_* = \frac{q}{\left[ \operatorname{erf} \left( qR_{B6}/\sqrt{6} \right) \right]^3}.$$

**Reference**

1. Gorniak T, Haraszti T, Garamus VM, Buck AR, Senkbeil T, et al. (2014) Nano-Scale Morphology of Melanosomes Revealed by Small-Angle X-Ray Scattering. PLoS ONE 9(3): e90884. doi:10.1371/journal.pone.0090884

**Citation:** The PLOS ONE Staff (2014) Correction: Nano-Scale Morphology of Melanosomes Revealed by Small-Angle X-Ray Scattering. PLoS ONE 9(7): e101746. doi:10.1371/journal.pone.0101746

**Published:** July 1, 2014

**Copyright:** © 2014 The PLOS ONE Staff. This is an open-access article distributed under the terms of the Creative Commons Attribution License, which permits unrestricted use, distribution, and reproduction in any medium, provided the original author and source are credited.
